# The illusion of personal health decisions for infectious disease management: disease spread in social contact networks

Matthew Michalska-Smith<sup>1,2</sup>, Eva A Enns<sup>3</sup>, Lauren A White<sup>4</sup>, Marie L J Gilbertson<sup>5</sup>, and  
Meggan E Craft<sup>1</sup>

<sup>1</sup>Department of Ecology, Evolution and behaviour, University of Minnesota, USA

<sup>2</sup>Department of Plant Pathology, University of Minnesota, USA

<sup>3</sup>School of Public Health, University of Minnesota, USA

<sup>4</sup>National Socio-Environmental Synthesis Center, University of Maryland, USA

<sup>5</sup>Veterinary Population Medicine Department, University of Minnesota, USA

September 2, 2022

## Abstract

1

2 Close contacts between individuals provide opportunities for the transmission of diseases, including COVID-  
3 19. Individuals take part in many different types of interactions, including those with classmates, co-workers,  
4 and household members; the conglomeration of all of these interactions produces a complex social contact  
5 network interconnecting individuals across the population. Thus, while an individual might decide their  
6 own risk tolerance in response to a threat of infection, the consequences of such decisions are rarely so  
7 confined, propagating far beyond any one person. We asses the effect of different population-level risk-  
8 tolerance regimes, population structure in the form of age and household-size distributions, and different  
9 types of interactions on epidemic spread in plausible human contact networks to gain insight into how  
10 contact network structure affects pathogen spread through a population. In particular, we find that changes  
11 in behaviour of vulnerable individuals in isolation is insufficient to reduce those individuals' infection risk,  
12 that population structure can have varied and counter-acting effects on epidemic outcomes, and that, in  
13 general, interactions among co-workers have a greater contribution to disease spread than do interactions  
14 among children at school. Taken together, these results promote a nuanced understanding of disease spread  
15 on contact networks, with implications for public health strategies.

## 1 Introduction

Many respiratory diseases, including influenza, tuberculosis, and COVID-19, are primarily transmitted through close contact between an infectious individual and a susceptible one, whether by direct physical contact or through expelling contaminated droplets via coughing, sneezing, or breathing [1]. While not all such interactions lead to a transmission event, the transmission network (*i.e.* the actual set of who infects whom in a population) is a subset of this wider contact network (*i.e.* the set of all interactions between individuals that could result in disease transmission) [2].

The importance of interpersonal contact for disease dynamics has been recognized for centuries, with isolation of infected individuals being recorded in fifteenth century Italy [3], and has become more formalized in recent decades [4, 5, 6]. Yet, detailing the specific ways in which the structure of contact networks relates to differences in disease spread between populations has been hampered by the size and complexity of human social networks, which are an agglomeration of many different kinds of interpersonal interactions [7]. A given person, for instance, will interact with some people at home (their family or housemates), others when they go to work (co-workers and colleagues), and yet others when they go to the local store for groceries (neighbors and strangers). Not only do the individuals involved in each of these sub-networks differ for any given person, but also the structure and intensity of interactions might likewise differ between contexts.

Pathogens spread differently in different localities in part because of a difference in social contact network structure [8, 9, 10, 6], thus we might also expect disease dynamics to vary across social contexts: to spread differently at work than at school, through a home than through a neighbourhood. Yet, unlike the case of two distinct localities, these layers of interactions are also not independent from one another, linked by the individuals that take part in multiple layers. It is the combination of these layers into an integrated network detailing all possible infection pathways that affects the ultimate spread of disease through a population. But how much does each type of interaction contribute to this final disease spread? Can the layers be modified independently in order to alter a population's risk in the face of disease spread?

Operationalizing the connection between contact network structure and disease spread, public health interventions such as travel restrictions, business and school closures, and individual isolation and/or quarantining seek to reduce disease spread through direct modification of the contact network [11, 12]. In short, such modifications seek to sever potential infection pathways through the contact network before they are realized, limiting the number of potential secondary cases available to a given infectious individual. These approaches can range from hyper-local—only isolating individuals who have been confirmed to be infected—to society-wide—wholesale economic lockdowns and *cordons sanitaire* [13].

47 In their initial response to the COVID-19 pandemic, many countries imposed strict restrictions on social  
48 interactions—especially those within schools and workplaces [14]—with the goal of limiting disease spread  
49 through the mass fragmentation of societal contact networks [15]. While such efforts have, in general, been  
50 found to be effective both historically [16], and in the current pandemic [17, 18], they are nevertheless  
51 a blunt intervention. More restrained approaches, such as test-trace-quarantine can be more surgical in  
52 their application, but their efficacy tends to be limited by insufficient participation and high costs when  
53 cases are surging [4, 19, 20]. A middle ground could involve restricting certain types of interactions while  
54 leaving others unaffected, balancing disease mitigation and socio-economic hardship (*e.g.* closing schools, but  
55 leaving workplaces open, or *vice versa*). Finally, not all public health interventions seek to completely sever  
56 links in the contact network. Softer approaches, such as masking, increased attention to personal hygiene,  
57 improved ventilation, and physical distancing can be used to reduce the strength of interactions, *i.e.* reduce  
58 the transmission rate given interaction between two individuals, rather than eliminating the interaction  
59 altogether [21, 22].

60 In addition to differences between types of interactions, which might be relatively consistent from one  
61 individual to another, there are also differences between individuals both in behaviour [23, 24] and in un-  
62 derlying health conditions that increase the likelihood of experiencing adverse health outcomes in the event  
63 of infection [25]. While a decision might be made on a personal level (*e.g.* one person might decide to return  
64 to in-person work, while another might take advantage of a work-from-home option), the consequences of  
65 this decision have the potential to propagate far beyond a focal individual, with individuals serving as either  
66 bridge or firewall in a pathogen’s infection chain.

67 In this work, we investigate the impact of plausible human contact network structure [26, 7, 13] on the  
68 spread of disease across three scales of network structure, using COVID-19 as an example. First, we consider  
69 differences in individual risk tolerance with respect to an individual’s contact with persons in the network  
70 who are at greater risk of adverse outcomes following infection (*i.e.* “vulnerable” individuals). Second, we  
71 consider the effect of wider population structure on the spread of disease, comparing two locales that differ in  
72 age- and household-size distributions. Finally, we add to these two considerations the relative contribution  
73 of two layers in the contact network (*i.e.* interactions between classmates at school and interactions between  
74 co-workers at work). We focus on these two layers in particular as they (along with household interactions)  
75 comprise the majority of potential transmission events in modern society [27], and have been the focus of  
76 prior research and public health interventions, better allowing us to contextualize any results [20, 14, 13,  
77 28]. Taken together, the results of this investigation provide a foundation for better understanding the

78 role of contact network structure on the spread of disease, and an avenue for better targeting public-health  
79 interventions to limit further disease spread.

## 80 **2 Methods**

### 81 **2.1 Network construction**

82 We constructed human contact networks by sequentially adding interaction layers to a base network of  
83 individuals grouped into households according to United States (US) 2019 American Community Survey  
84 data on the distribution of household sizes [29]. Each individual was assigned an age (according to US  
85 2019 American Community Survey data [30]) and a binary “vulnerable” status. Vulnerability was assigned  
86 according to age-adjusted hospitalization rates [31]. School-age children were then assigned to classrooms  
87 (using an approximate classroom size of 20 students), and pre-retirement-age adults (accounting for US  
88 unemployment rates) to workplaces (according to a modified distribution of US business sizes). To make  
89 our networks more realistic, we additionally considered the effect of community spread of disease outside  
90 of the structured settings of work and school (*e.g.* spread at the grocery store or local shopping center).  
91 For this, we added a layer connecting all individuals in the network to all others at a low transmission rate  
92 (*i.e.* “background transmission”).

93 Each of these four network layers is a collection of distinct, fully connected sub-networks that correspond  
94 to households, classrooms, workplaces, or the community as a whole. By layering these networks together,  
95 the isolated clusters from any one layer become intertwined through the connections in other layers. For  
96 example, a student might be connected to an unrelated, vulnerable adult through an interaction chain  
97 involving a classmate interaction with a friend, a household interaction between the friend and their parent,  
98 and a workplace interaction between the parent and an elderly co-worker. The strength of interaction in  
99 the co-worker and classmate interaction layers was varied systematically to explore the relative importance  
100 of each of these layers, while those in the household layer (as well as background transmission) were held  
101 constant.

102 We considered two US states as case studies for comparing differences in local population structure. Using  
103 US 2019 American Community Survey data (see Supplementary Information section S1 for detailed data  
104 sources), we constructed synthetic networks with age- and household-size distributions matching those of  
105 either Florida—a US state with a relatively high average age and small average household size—or Texas—a  
106 US state with a relatively low average age and large average household size (section S2 and fig. S1). Each

Table 1: Summary statistics for networks generated for each of the two localities used in the main text.

| Metric                                                           | “Florida” mean (sd) <sup>1</sup> | “Texas” mean (sd) <sup>1</sup> |
|------------------------------------------------------------------|----------------------------------|--------------------------------|
| Number of individuals                                            | 3 001                            | 3 000                          |
| Number school-age                                                | 503 (20.5)                       | 648 (22.5)                     |
| Number employed                                                  | 1 549 (27.4)                     | 1 595 (27.5)                   |
| Number vulnerable                                                | 628 (22.2)                       | 535 (20.9)                     |
| Number of households                                             | 1 212                            | 1 056                          |
| Number households with children                                  | 462 (15.1)                       | 517 (13.4)                     |
| Number of households with vulnerable                             | 508 (16.3)                       | 423 (14.9)                     |
| Total number of edges (no contact avoidance) <sup>2</sup>        | 24 961 (611.1)                   | 28 411 (578.5)                 |
| Household edges                                                  | 3 425                            | 4 519                          |
| Classmate edges                                                  | 5 890 (307.7)                    | 7 744 (345.0)                  |
| co-worker edges                                                  | 15 646 (593.2)                   | 16 148 (560.5)                 |
| Edges when vulnerable individuals avoid work/school interactions | 17 655 (564.1)                   | 20 766 (570.6)                 |
| Edges when members of vulnerable households avoid interactions   | 7 857 (539.2)                    | 8 605 (610.1)                  |

<sup>1</sup> Values are presented with both mean and standard deviation except when there was no variance, in which case the constant value is presented.

<sup>2</sup> “Background” transmission links are omitted from this (and other edge) count(s). Because they connect every individual to every other, there are always  $N(N - 1)/2$  such edges, where  $N$  is the number of individuals in the network.

107 network was further populated with classmate and co-worker interaction layers, as detailed above, using the  
 108 same algorithm and parameters for both localities. Networks were generated to have approximately the same  
 109 number of individuals (3 000), which necessitates a different number of households in each network due to  
 110 the aforementioned differences in average household size.

111 Finally, we modified the above networks according to three risk-tolerance scenarios, generalizing be-  
 112 haviours to all individuals in the population. First, we considered a population in which all individuals,  
 113 regardless of inherent vulnerability, behave identically, fully participating in their co-worker and classmate  
 114 interactions. Second, we considered a case where vulnerable individuals avoid those interactions (*i.e.* do not  
 115 go to work/school and therefore have no co-worker or classmate interactions) in order to reduce their own  
 116 exposure risk. Finally, we considered a case where all members of any household containing at least one  
 117 vulnerable individual avoid co-worker and classmate interactions in an effort to reduce exposure to their  
 118 vulnerable housemates. Table 1 details differences between the networks constructed for each of the two  
 119 locales and under different risk-tolerance scenarios.

## 120 2.2 Disease simulation

121 Pathogen spread through the population was simulated according to modified SEIR dynamics, using a  
 122 discrete-time, chain binomial model [32]. Specifically, individuals (nodes) in the network fell into one of

123 six classes at each timestep: susceptible to infection ( $S$ ), exposed but not yet infectious ( $E$ ), infectious  
124 and symptomatic ( $I_s$ ), infectious and asymptomatic ( $I_a$ ), recovered and immune to future infection ( $R$ ), or  
125 a victim of disease-induced mortality ( $D$ ). Transitions between classes were governed by rate parameters  
126 (table 2) that, when appropriate, could take two discrete values based on an individuals' inherent vulnerability  
127 to severe disease.

128 Explicitly, susceptible nodes can be infected at each timestep depending on their network connections:

$$S \xrightarrow{\beta_x^{j,i}} E.$$

129 Where  $\beta_x^{j,i}$  is the rate of transmission between two nodes, one infectious ( $i$ ) and one susceptible ( $j$ ),  
130 connected by interaction type  $x$ . A susceptible individual will have the chance to be infected by each of  
131 their infectious interaction partners on each timestep. We considered three alternative rates of background  
132 transmission (table 2), but only present figures corresponding to a value of  $\beta_{background} = 0.001/N$  (where  
133  $N$  is the number of nodes in the network) in the main text. See Supplementary Information section S3 for  
134 figures corresponding to values of 0 and  $0.1/N$ .

135 Exposed individuals' experience disease progression at a constant rate:

$$E \xrightarrow{\sigma*\rho} I_s, E \xrightarrow{\sigma*(1-\rho)} I_a.$$

136 Where  $\sigma$  represents the disease progression rate (the inverse of the time between becoming infected and  
137 becoming infectious) and  $\rho$  is the proportion of infected individuals that develop symptoms. Infectious  
138 individuals recover or die at constant rates (depending on their symptomaticity and inherent vulnerability):

$$I_s \xrightarrow{(1-\frac{2}{3}\delta(i))\gamma} R, I_a \xrightarrow{(1-\frac{2}{3}\delta(i))\gamma} R, I_s \xrightarrow{\mu+\delta(i)\nu} D$$

139 Where  $\delta(i)$  is an indicator function that returns 1 if an individual is vulnerable, and 0 otherwise,  $\gamma$   
140 represents the rate of recovery, which is (approximately three times) longer for vulnerable individuals [33,  
141 34],  $\mu$  represents a baseline mortality rate, and  $\nu$  represents additional mortality experienced by vulnerable  
142 individuals. All disease parameters were set to literature values approximated for the initial wave (original  
143 Wuhan strain) of COVID-19 (table 2).

144 Note that we assume: 1) per-contact transmission rates are independent of the symptomaticity of the  
145 infectious interaction partner, 2) all mortality is disease induced, and 3) that only symptomatic individuals  
146 suffer disease-induced mortality.

Table 2: Estimates and description of parameters for the SARS-CoV-2 model used in this work.

| Parameter            | Description                                                                      | Point Estimate*             | Reference(s)                                 |
|----------------------|----------------------------------------------------------------------------------|-----------------------------|----------------------------------------------|
| $\beta_{background}$ | The transmission rate for community interactions                                 | 0, 0.001/ $N$ , or 0.1/ $N$ |                                              |
| $\beta_{household}$  | The transmission rate for interactions between household members                 | 0.13                        | Rosenberg et al. [35],<br>Bar-On et al. [36] |
| $\beta_{classmate}$  | The transmission rate for interactions between classmates                        | none <sup>†</sup>           |                                              |
| $\beta_{co-worker}$  | The transmission rate for interactions between co-workers                        | none <sup>†</sup>           |                                              |
| $\sigma$             | The incubation period (the inverse of the average latent period duration)        | 1/5.5                       | Bar-On et al. [36]                           |
| $\rho$               | Proportion of new infectious individuals that are symptomatic                    | 0.35 <sup>‡</sup>           | Wang et al. [37],<br>Bar-On et al. [36]      |
| $\gamma$             | The recovery rate (the inverse of the average duration of the infectious period) | 1/4.5                       | Bar-On et al. [36]                           |
| $\mu$                | Baseline mortality rate for symptomatic, non-vulnerable individuals              | 1/27 000                    | The World Bank [38],<br>Ugarte et al. [39]   |
| $\nu$                | Additional mortality due to vulnerability                                        | 1/1 000                     | Bar-On et al. [36]                           |

\* Units are days<sup>-1</sup> unless otherwise noted;  $N$  signifies the number of individuals in the network.

<sup>†</sup> values sampled from  $10^{[-3, -0.5]}$  (one for each transmission rate per simulation), where  $[a, b]$  represents a range from  $a$  to  $b$  (inclusive) from which values were uniformly randomly sampled.

<sup>‡</sup> this value is unit-less

147 Populations were seeded with a single infected individual and simulations were allowed to run until  
 148 no further infections were possible. A total of 10 000 unique combinations of classmate ( $\beta_{classmate}$ ) and co-  
 149 worker ( $\beta_{co-worker}$ ) transmission rates were sampled using a Latin-Hypercube approach [40], each parameter  
 150 combination was run for each of the two localities and three risk-tolerance regimes, leading to a total of 60 000  
 151 simulated epidemics.

### 152 2.3 Epidemic outcome quantification

153 Epidemic spread was quantified using the total number of individuals infected, the total number of vul-  
 154 nerable individuals infected, the average number of individuals concurrently infectious, the total number of  
 155 individuals that died, the maximum number of concurrently infectious individuals, the number of timesteps  
 156 to reach that peak, and the number of timesteps that passed before the first vulnerable individual was  
 157 infected.

158 All simulations were conducted in C++ version 8.1.0, with data manipulation and plotting done in R  
 159 version 4.2.0 [41]. For specific packages used, see Supplementary Information section S4. Code to replicate all  
 160 aspects of these analyses is available online: [https://github.com/mjsmith037/Layered\\_Interactions\\_](https://github.com/mjsmith037/Layered_Interactions_)



161 COVID\_Model.

## 162 **3 Results & discussion**

### 163 **3.1 Quantifying the effect of differential risk-tolerance behaviour**

164 As expected, increasing the transmission rate for classmates or co-workers increased the number of infectious  
165 individuals, the number of vulnerable people infected and the total number of individuals that died (fig. 1).  
166 Yet, this effect was modulated by behaviour: in particular, we found that the actions of vulnerable individuals  
167 in isolation did little to reduce the total disease burden on the population in terms of number of cases  
168 and deaths, except when transmission rates were already low. However, there was a substantial reduction  
169 in these values when household members likewise avoided work/school interactions themselves from other  
170 individuals in the network (fig. 1). This trend was consistent across metrics of epidemic outcome, such  
171 as the peak infection prevalence, the number of vulnerable individuals infected, and the total number of  
172 deaths. Likewise, we saw consistency across a range of transmission rates between classmates and between  
173 co-workers, though if both rates were sufficiently low (bottom left corner of each panel in fig. 1), the extent  
174 of disease spread was minimal. Importantly, if background transmission rates are high enough, classmate  
175 and co-worker transmission is rendered irrelevant, precluding any differences between behaviour treatments  
176 (Supplementary Information fig. S5). We emphasize that these effects are not simply a result of reducing  
177 the number of interactions in the network. Repeating the above simulations (*i.e.* removing the same number  
178 of edges from each interaction layer in the network as above), but choosing which links within each layer  
179 to remove at random (*i.e.* irrespective of an individuals (contact with) vulnerable individuals), yields no  
180 qualitative difference between link-removal treatments (section S5 and fig. S8). Finally, these patterns were  
181 also consistent across local population structures (*i.e.* Texas or Florida), so we aggregated results across  
182 locales for figs. 1, S2, S5 and S8.

183 The absence of reduced disease burden when only vulnerable individuals change their behaviour can  
184 be attributed, at least in part, to the high-interaction strength expected for within-household interactions,  
185 limiting the efficacy of contact-reduction for vulnerable individuals sharing households with less vulnerable  
186 individuals. Unless the whole household takes actions to reduce their exposure, we see limited benefits  
187 of reducing a particular individuals exposure in isolation. This is true even if we only look at the rates  
188 of infection in the vulnerable individuals themselves. Moreover, because the vast majority of deaths from  
189 COVID-19 are individuals with underlying health conditions that provide an inherent vulnerability to adverse

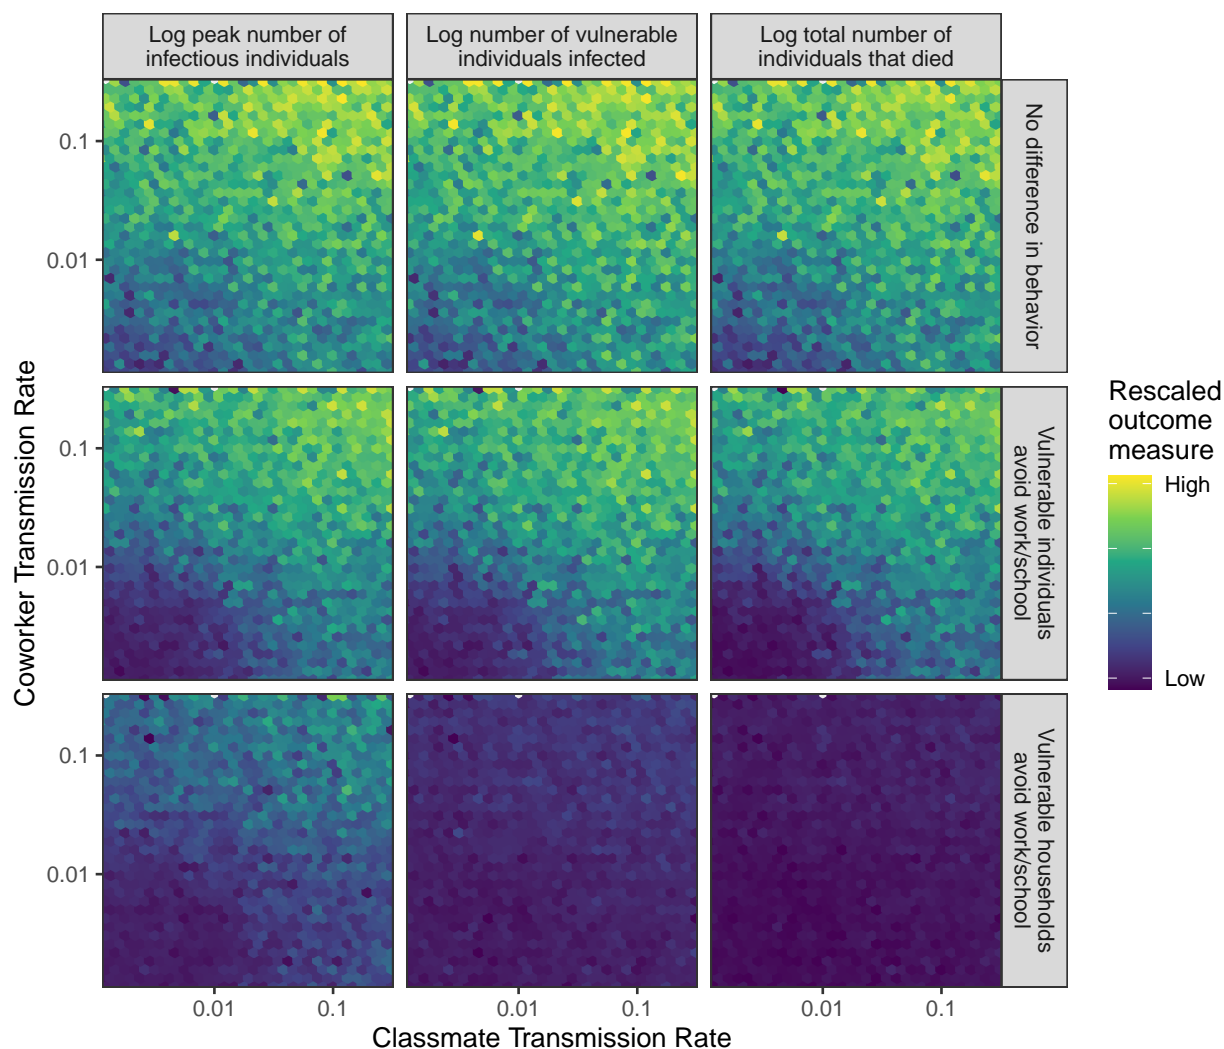

Figure 1: Relative epidemic outcome (columns), quantified as the peak number of individuals infected (left), the number of vulnerable individuals infected (middle), or the total number of individuals that died (right) over the course of the simulation. Individuals in the network either (rows): did not change behaviour in response to (contact with individuals with) vulnerability status (top), changed behaviour if they were vulnerable themselves (middle), or changed behaviour when a member of their household was vulnerable (bottom). Multiple points within each hexagon were averaged to produce the plotted value. Mean values were then log-scaled and normalized for each epidemic outcome such that the maximum value is 1 (yellow) and the minimum value is 0 (purple). Each panel consists of a heatmap showing the relative epidemic outcome of simulations spanning various levels of co-worker (vertical axis) and classmate (horizontal axis) transmission. Maximum disease burden in all cases occurs when the transmission rates are both high (top right corners of each panel), while the disease tends to die out with minimal cases and death when both rates are low (bottom left of each panel). Results here are aggregated across local population structures, which were qualitatively similar. See Supplementary Information (section S3 and figs. S2 and S5) for analogous figures under different background transmission rates.

190 outcomes [42], reducing the number of vulnerable individuals infected has a direct effect of reducing mortality  
191 as well.

192 It is important to also note that not all interaction decisions are the product of (or even align with)  
193 a particular individual’s risk tolerance, but rather are the combined product of individual decisions and  
194 systemic social and workplace structures that constrain individual behaviour. This is a critical consideration  
195 in the construction of policy, especially when such policies tend to be focused on individuals themselves  
196 and (occasionally) those directly under their care, rather than a consideration of potential interactions with  
197 (and consequent transmission risk to) other vulnerable individuals [43]. For instance, those with underlying  
198 health conditions might be able to apply for remote work with a note from a medical provider, however,  
199 they are less likely to be granted accommodation if their housemate is the vulnerable individual. Relatedly,  
200 such policies have historically been applicable only after an individual is infected, rather than allow for the  
201 reduction of transmission prophylactically. More effective protection of vulnerable individuals would require  
202 facilitating household-wide action to reduce exposures [44, 45].

### 203 **3.2 Quantifying the effect of population structure**

204 Beyond individual risk-management, we found intrinsic differences in epidemic dynamics between populations  
205 that differed in their age or household size distributions. Comparing a “Florida-like” population to a “Texas-  
206 like” population (just “Florida” and “Texas”, hereafter), we find consistent, slight differences in the peak  
207 proportion of the population infectious at a given time (“Maximum Infectious”) and in the proportion of  
208 vulnerable individuals in the network that are infected over the course of the epidemic (fig. 2). Note that  
209 while vulnerable individuals make up a larger proportion of the population, on average, in Florida, we see  
210 a higher proportion of vulnerable individuals getting infected in the Texas population. This is a result of  
211 the higher rate of spread (also indicated by the higher peak proportion infectious) in the latter population,  
212 due in part to the larger average household size, and consequent higher number of strong within-household  
213 interactions.

214 It is noteworthy that these small differences in peak proportion of the population concurrently infectious  
215 and proportion of vulnerable individuals infected were insufficient to fully counter the greater intrinsic  
216 mortality risk of the Florida population. This could be due, in part to the counter-acting effects of age  
217 and household size distributions. In short, the household size distribution of Texas tends to lead to larger  
218 outbreaks, but the larger proportion of vulnerable individuals in Florida means that a similar number of  
219 individuals die despite fewer total people being infected.

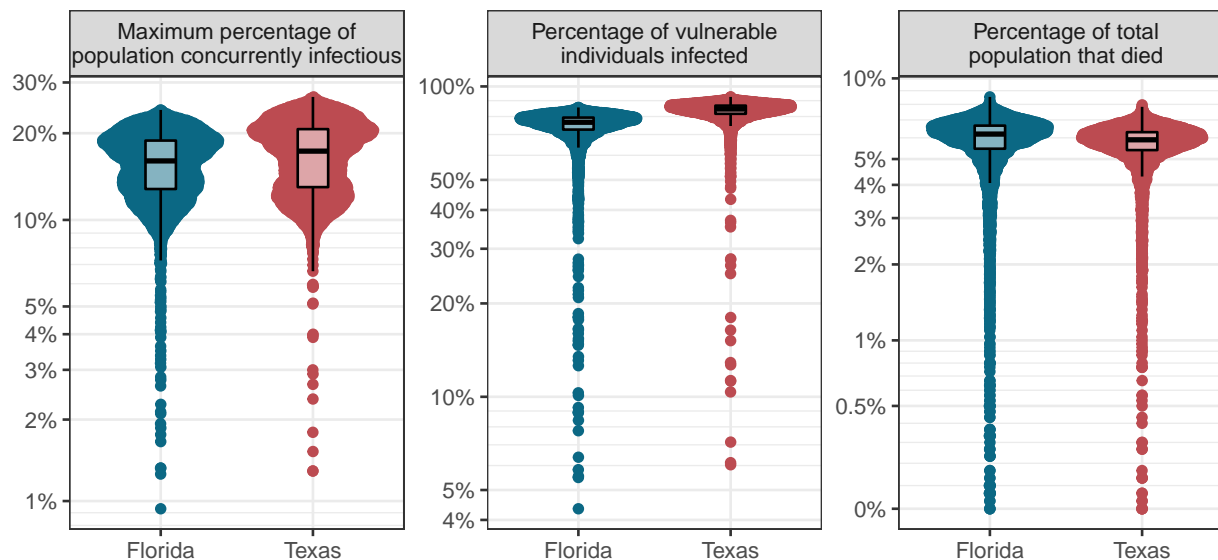

Figure 2: Comparing the difference in peak proportion infectious, overall prevalence among vulnerable individuals, and overall mortality between simulations of epidemics in two possible population structures, as characterized by age- and household-size distributions (see Supplementary Information and table 1). Florida has an (on average) older age distribution than Texas, while Texas has (on average) larger households. Each point represents a single simulated epidemic, conducted across a range of classmate- and co-worker transmission rates. Only simulations with no difference in behaviour based on vulnerability and only outcomes from epidemics resulting in greater than 5% of the total population being infected are shown (5 778 simulations for Florida, 6 297 for Texas). *n.b.* each panel has independent vertical axes limits. See Supplementary Information (section S3 and figs. S3 and S6) for analogous figures under different background transmission rates.

220 These results point to the importance of understanding trade-offs and nuances in population structure  
221 when implementing public health interventions. For instance, when distributing effort to minimize lives-lost,  
222 one must consider both properties of individuals in the population (*e.g.* what proportion of the population  
223 is at increased vulnerability to adverse outcomes?) and properties of the social contact network that in-  
224 terconnects those individuals (*e.g.* what are the most likely infection pathways by which those vulnerable  
225 people can become infected?). The efficacy and cost efficiency of any public health efforts will depend on  
226 understanding these nuances and their interaction. For instance, it may be more effective to isolate young  
227 family members of vulnerable individuals than vulnerable individuals themselves, since the latter tend to be  
228 older and have fewer social interactions to begin with [27].

229 Of course, the social and economic consequences of any intervention (which may be related to the total  
230 number of interactions removed under intervention) must likewise be taken into consideration [46]. Criti-  
231 cally, the effects of public policies have unequal effects across a population: school closure most negatively  
232 affects less-educated families [47], wealthier individuals are more able to tolerate (and comply with) travel  
233 restrictions [48, 46], and already marginalized communities often bear the brunt of adverse medical out-  
234 comes [49]. Likewise, the distribution of underlying medical conditions is not distributed uniformly across  
235 the population, often correlating with race and socio-economic status [50, 51]. Thus, an intervention focused  
236 on (families of) vulnerable individuals, will necessarily also have disparate social and financial impact on  
237 these already marginalized individuals. In short, while this study focuses on generic effects of contact net-  
238 work structure on disease spread, real-world applications must additionally consider the specifics of which  
239 individuals are affected by a policy decision.

### 240 **3.3 Quantifying effects of interaction types**

241 While it is difficult to disentangle the web of interactions that make up modern societies, we used linear  
242 models to investigate the effects of a given change in interaction strength in one layer on the rate or extent  
243 of disease spread in the population.

244 We found that a change in the co-worker transmission rate consistently resulted in a larger change in  
245 epidemic outcome than a similarly sized change in the classmate transmission rate (fig. 3). For example, an  
246 increase in co-worker transmission rate will have approximately twice the effect on peak proportion infectious,  
247 total death burden, and time to that peak than will a similar increase in classmate transmission. When  
248 considering the scenario of no change in behaviour based on vulnerability, this ratio climbs to approximately  
249 3. Consistent with results in fig. 1, we saw smaller slopes (and reduced differences between the effects of

250 different network layers) for total number of deaths when households containing vulnerable individuals limited  
251 exposure. Consistent with fig. 2, we saw that changes in transmission rates tended to have a larger effect  
252 (*i.e.* model coefficient magnitude) on epidemic size in Texas, and on mortality in Florida (driven mostly by  
253 workplace interactions).

254 This is driven in part by the difference in the number of interactions in the network associated with each  
255 layer of the network. Because there are more individuals of working age than of school age, and because  
256 workplaces can potentially be much larger than classrooms, there tends to be more co-worker interactions  
257 in a given network than classmate interactions. While this is dependent upon the assumptions underlying  
258 construction of these simulated contact networks, it is also generically true of the real human contact net-  
259 works that inspired our approach. In most real-world societies, there are more working-age individuals than  
260 children, and workplaces can potentially be orders of magnitude larger than school classrooms. The fact  
261 that these results seem to be robust to imbalance in interaction strength suggests that network structure  
262 (broadly construed) may have a larger role to play than pairwise interaction strength, at least for a highly  
263 transmissible disease like COVID-19.

264 While the surface-level implication of these results is that efforts should be focused on workplaces, rather  
265 than classrooms (and this is reinforced by evidence that, at least for early strains of SARS-CoV-2, trans-  
266 mission to, from, and among children may be less than that among adults; [35, 52, 53, 54]), schools still  
267 contribute meaningfully to disease spread, especially when considering some of the more recent (and more  
268 transmissible) strains of SARS-CoV-2 [55]. Importantly, these results are based on simulations where the  
269 internal networks for workplaces are very highly connected. Compartmentalizing workers, improving per-  
270 sonal hygiene, ensuring adequate ventilation and air filtration, and supporting personal protective equipment  
271 usage can all alter the number and strength of interactions within the network. Such interventions would  
272 reduce the overall impact of workplace interactions on disease spread.

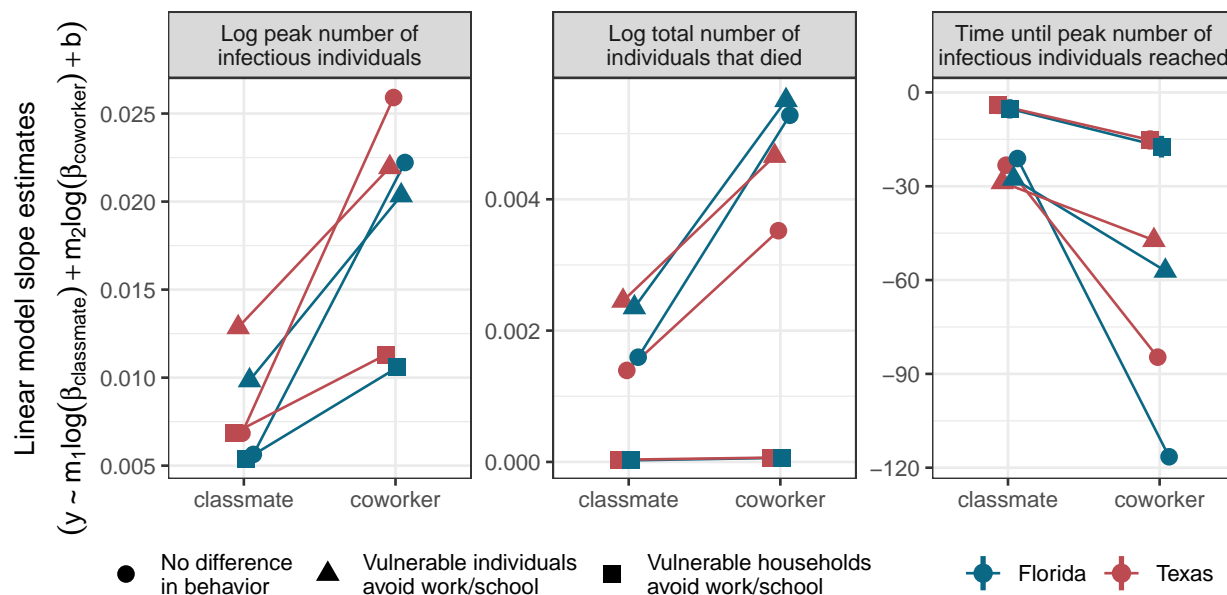

Figure 3: Quantifying the effect of changes in transmission rates on epidemic outcomes. The vertical axis indicates the value of the best-fitting coefficient for each transmission rate in a linear model of the form  $y \sim m_1 \log(\beta_{\text{classmate}}) + m_2 \log(\beta_{\text{co-worker}}) + b$ , where  $y$  indicates an epidemic outcome measure,  $m_n$  is a fitted slope coefficient,  $\beta_x$  represents a transmission rate for interaction type  $x$ , and  $b$  is a fitted intercept coefficient. The horizontal axis distinguishes between the two coefficients ( $m_1$ : “classmate”, or  $m_2$ : “co-worker”). Facets distinguish between epidemic outcome measures, point shapes distinguish risk-tolerance regimes (*i.e.* rows in fig. 1), and point colours distinguish age and household size distribution locales (as in fig. 2). Vertical lines extending beyond the point extents indicate 95% confidence intervals for the slope estimates (most confidence intervals are obscured by the points). To ease interpretation, lines connect coefficient values across interaction types for results from models of the same risk-tolerance regime and locale. Points are slightly offset horizontally to reduce overlap. Note that a more positive slope in the left and center facets indicates a greater number of individuals infectious or died, respectively, while a more negative slope in the right facet indicates a faster rate of infection (less time to reach peak infectiousness). Only outcomes from epidemics resulting in greater than 5% of the total population being infected were included in the linear models (13 182 simulations for Florida, 14 844 for Texas). *n.b.* each panel has independent vertical axes limits. See Supplementary Information (section S3 and figs. S4 and S7) for analogous figures under different background transmission rates.

## 273 4 Limitations & future directions

274 While the networks used in this study are inspired by empirical human contact networks, there were nonethe-  
275 less many assumptions built into their construction that are necessarily unrealistic. Future studies could,  
276 for example, consider differences in fine-scale network structure between interaction types, add additional  
277 explicit interaction layers, and increase network size to better reflect a whole urban area. In particular,  
278 one might nest individual classrooms within a less-strongly connected collection to represent a school, where  
279 interactions can likewise occur in public spaces such as the cafeteria or library [26, 56]. Such interactions  
280 are increasingly likely as schools relax their physical distancing requirements. Similarly, there might be  
281 differences in between- and within-classroom structure for differently aged students. Within workplaces,  
282 there might be a hierarchical network structure, where some peoples (*e.g.* managers) might interact with a  
283 collection of individuals that otherwise have little interaction with one another. Finally, we focused on only  
284 two types of interactions: those between classmates and those between co-workers. Clearly, there are myriad  
285 other ways in which individuals interact with one another, each of which might be structured in unique ways.

286 This study was in part limited by available data sources. While national-level data is readily available  
287 for most elements of our network generation, the same data for localities (even at the level of US states) is  
288 less accessible. An additional consideration is covariance between different aspects of population structure,  
289 where most data sources are segmented. For instance, one might assume that larger households have a lower  
290 average age (*i.e.* more children), yet age and household-size distributions are only available independently  
291 through the US Census American Community Survey.

292 In our disease model, we utilized disease parameters corresponding to the initial wave of COVID-19,  
293 despite substantial strain evolution since that time. Because our focus in this work is not on any one disease  
294 in particular, we opted to use an older strain for the increased availability and reliability of parameter  
295 estimates. These literature-based parameters additionally result in mortality being almost exclusively among  
296 vulnerable individuals—a trait we treated as binary and assigned based on post hoc empirical hospitalization  
297 rates. A more robust approach would be to consider the distribution of specific underlying health conditions  
298 within the population and their relative contribution to adverse outcomes. Critically, this approach also  
299 assumes constant mortality rates, disregarding a known relationship in which increased hospital occupancy  
300 results in worse disease outcomes [57].



## 301 **5 A note on generality**

302 In the midst of an ongoing pandemic of COVID-19, much of the inspiration for this work, and literature  
303 referenced herein has considered this one disease in particular. Nevertheless, the results presented here stem  
304 from a disease model that could be applied to many transmissible diseases with minimal modification. Even in  
305 the consideration of SARS-CoV-2, as new strains arise, resulting in altered rates of transmission, progression,  
306 recovery, and/or mortality, we expect the fundamental effects of network structure on disease spread to  
307 persist. For instance, as COVID-19 mortality rates have sequentially declined over the past two years,  
308 focus has shifted from mortality to hospitalization. As the drivers behind hospitalization and mortality are  
309 largely equivalent [58, 59], one could apply this same framework in the context of hospitalization. Likewise,  
310 vaccination (depending on efficacy) can be thought of as equivalent to either removing interactions (as in  
311 isolation) or reducing interaction strength (as in increased mask usage). Thus, omitting consideration of the  
312 additional benefits of reduced disease severity on the vaccinated individual, vaccination strategy could mirror  
313 consideration of physical distancing recommendations in this work. Importantly, when reduction of disease  
314 severity is additionally considered, previous work has suggested that prioritizing vulnerable individuals is  
315 most efficacious [60].

## 316 **6 Conclusion**

317 Our simulations reinforce the consequences of our highly connected, modern society on disease spread. In  
318 short, we find that decisions are rarely “personal” when it comes to public health, and the policies and health  
319 decisions of a population can have dramatic effects of the spread of disease. Action by vulnerable individuals  
320 in isolation does little to reduce their disease burden, suggesting that policies should additionally consider  
321 the potential for next-order transmission to vulnerable individuals from the less-vulnerable individuals that  
322 interact with them. Additionally, a population’s composition and social contact network structure can  
323 have marked effects on disease prevalence and mortality, though in our analysis these relationships were  
324 slight and sometimes resulted in counter-intuitive results whereby rapid disease spread can counteract the  
325 benefit of an otherwise less-vulnerable population. Finally, the structure of workplaces potentially provides  
326 greater avenues for disease spread than do schools, but these effects are highly dependent on both how  
327 workplaces/schools are structured, as well as the utilization and efficacy of non-pharmaceutical interventions  
328 in each of these contexts.

329 While over-interpretation of specific values should be avoided in purely simulation-based studies such as

330 these, comparisons between different simulations can nevertheless provide insight into the relative importance  
331 of different components of a contact network on the rate and extent of disease spread. By comparing  
332 simulations across constrained axes of variation, such as types of interactions, differences in personal risk  
333 tolerance (or systemic structures and policies), and different population structures, we glean insights into  
334 how the different layers of social contact networks can have different levels of importance when it comes  
335 to containing epidemic spread. We can use this nuanced understanding to better inform and differentiate  
336 between public health strategies.

## 337 **7 Acknowledgements**

338 We thank Janine Mistrick, Chris Wojan, Emily Schafsteck, Desiree Walton, and Lisa Meyer for feedback on  
339 early drafts of this work.

## 340 **8 Funding**

341 This work was supported by the National Science Foundation [DEB 1654609 and 2030509], a University of  
342 Minnesota Office of Academic Clinical Affairs COVID-19 Rapid Response Grant, the Office of the Director,  
343 National Institutes of Health [NIH T32OD010993], the University of Minnesota Informatics Institute Mn-  
344 DRIVE program, the Van Sloun Foundation, and by the National Socio-Environmental Synthesis Center  
345 (SESYNC) under funding received from the National Science Foundation [DBI 1639145]. The content is  
346 solely the responsibility of the authors and does not necessarily represent the official views of the National  
347 Institutes of Health.

## 348 **References**

- 349 1. Leung NH. Transmissibility and transmission of respiratory viruses. *Nat. Rev. Microbiol.* 2021; 19 (8)  
350 :528–45. DOI: 10.1038/s41579-021-00535-6
- 351 2. Danon L, House TA, Read JM, and Keeling MJ. Social encounter networks: collective properties and  
352 disease transmission. *J. Royal Soc. Interface* 2012; 9 (76) :2826–33. DOI: 10.1098/rsif.2012.0357
- 353 3. Harrison M. Contagion: How Commerce Has Spread Disease. Yale University Press, 2012

- 354 4. Huerta R and Tsimring LS. Contact tracing and epidemics control in social networks. *Phys. Rev. E*  
355 2002; 66 (5) :056115. DOI: 10.1103/PhysRevE.66.056115
- 356 5. Morris M. Epidemiology and social networks: Modeling structured diffusion. *Sociol. Methods & Res.*  
357 1993; 22 (1) :99–126. DOI: 10.1177/0049124193022001005
- 358 6. Danon L, Ford AP, House T, Jewell CP, Keeling MJ, Roberts GO, Ross JV, and Vernon MC. Networks  
359 and the epidemiology of infectious disease. *Interdiscip. Perspect. on Infect. Dis.* 2011. DOI: 10.1155/  
360 2011/284909
- 361 7. Nande A, Adlam B, Sheen J, Levy MZ, and Hill AL. Dynamics of COVID-19 under social distancing  
362 measures are driven by transmission network structure. *PLOS Comput. Biol.* 2021; 17 (2) :e1008684.  
363 DOI: 10.1371/journal.pcbi.1008684
- 364 8. Read JM and Keeling MJ. Disease evolution on networks: the role of contact structure. *Proc. Royal*  
365 *Soc. B: Biol. Sci.* 2003; 270 (1516) :699–708. DOI: 10.1098/rspb.2002.2305
- 366 9. Ames GM, George DB, Hampson CP, Kanarek AR, McBee CD, Lockwood DR, Achter JD, and Webb  
367 CT. Using network properties to predict disease dynamics on human contact networks. *Proc. Royal*  
368 *Soc. B: Biol. Sci.* 2011; 278 (1724) :3544–50. DOI: 10.1098/rspb.2011.0290
- 369 10. Kamp C. Untangling the interplay between epidemic spread and transmission network dynamics.  
370 *PLOS Comput. Biol.* 2010; 6 (11). DOI: 10.1371/journal.pcbi.1000984
- 371 11. Espinoza B, Castillo-Chavez C, and Perrings C. Mobility restrictions for the control of epidemics:  
372 When do they work? *PLOS ONE* 2020; 15 (7) :e0235731. DOI: 10.1371/journal.pone.0235731
- 373 12. Camitz M and Liljeros F. The effect of travel restrictions on the spread of a moderately contagious  
374 disease. *BMC Med.* 2006; 4 (1) :1–10. DOI: 10.1186/1741-7015-4-32
- 375 13. Aleta A, Martin-Corral D, Pastore y Piontti A, Ajelli M, Litvinova M, Chinazzi M, Dean NE, Halloran  
376 ME, Longini Jr IM, Merler S, et al. Modelling the impact of testing, contact tracing and household  
377 quarantine on second waves of COVID-19. *Nat. Hum. Behav.* 2020; 4 (9) :964–71. DOI: 10.1038/  
378 s41562-020-0931-9
- 379 14. D'angelo D, Sinopoli A, Napoletano A, Gianola S, Castellini G, Del Monaco A, Fauci AJ, Latina R,  
380 Iacorossi L, Salomone K, et al. Strategies to exiting the COVID-19 lockdown for workplace and school:  
381 A scoping review. *Saf. Sci.* 2021; 134 :105067. DOI: 10.1016/j.ssci.2020.105067

- 382 15. Anderson RM, Heesterbeek H, Klinkenberg D, and Hollingsworth TD. How will country-based mitiga-  
383 tion measures influence the course of the COVID-19 epidemic? *The Lancet* 2020; 395 (10228) :931–4.  
384 DOI: 10.1016/S0140-6736(20)30567-5
- 385 16. Glass RJ, Glass LM, Beyeler WE, and Min HJ. Targeted social distancing designs for pandemic  
386 influenza. *Emerg. Infect. Dis.* 2006; 12 (11) :1671. DOI: 10.3201/eid1211.060255
- 387 17. Koh WC, Naing L, and Wong J. Estimating the impact of physical distancing measures in containing  
388 COVID-19: an empirical analysis. *Int. J. Infect. Dis.* 2020; 100 :42–9. DOI: 10.1016/j.ijid.2020.  
389 08.026
- 390 18. Prakash N, Srivastava B, Singh S, Sharma S, and Jain S. Effectiveness of social distancing interventions  
391 in containing COVID-19 incidence: International evidence using Kalman filter. *Econ. & Hum. Biol.*  
392 2022; 44 :101091. DOI: 10.1016/j.ehb.2021.101091
- 393 19. Gardner BJ and Kilpatrick AM. Contact tracing efficiency, transmission heterogeneity, and acceler-  
394 ating COVID-19 epidemics. *PLOS Comput. Biol.* 2021; 17 (6) :e1009122. DOI: 10.1371/journal.  
395 pcbi.1009122
- 396 20. Kerr CC, Mistry D, Stuart RM, Rosenfeld K, Hart GR, Núñez RC, Cohen JA, Selvaraj P, Abeysuriya  
397 RG, Jastrzębski M, et al. Controlling COVID-19 via test-trace-quarantine. *Nat. Commun.* 2021; 12  
398 (1) :1–12. DOI: 10.1038/s41467-021-23276-9
- 399 21. Chu DK, Akl EA, Duda S, Solo K, Yaacoub S, Schünemann HJ, El-harakeh A, Bognanni A, Lotfi  
400 T, Loeb M, et al. Physical distancing, face masks, and eye protection to prevent person-to-person  
401 transmission of SARS-CoV-2 and COVID-19: a systematic review and meta-analysis. *The Lancet*  
402 2020; 395 (10242) :1973–87. DOI: 10.1016/j.jvs.2020.07.040
- 403 22. Howard J, Huang A, Li Z, Tufekci Z, Zdimal V, Westhuizen HM van der, Delft A von, Price A,  
404 Fridman L, Tang LH, et al. An evidence review of face masks against COVID-19. *Proc. National*  
405 *Acad. Sci.* 2021; 118 (4). DOI: 10.1073/pnas.2014564118
- 406 23. Nofal AM, Cacciotti G, and Lee N. Who complies with COVID-19 transmission mitigation behavioral  
407 guidelines? *PLOS ONE* 2020; 15 (10) :e0240396. DOI: 10.1371/journal.pone.0240396
- 408 24. Bavel JJV, Baicker K, Boggio PS, Capraro V, Cichocka A, Cikara M, Crockett MJ, Crum AJ, Douglas  
409 KM, Druckman JN, et al. Using social and behavioural science to support COVID-19 pandemic  
410 response. *Nat. Hum. Behav.* 2020; 4 (5) :460–71. DOI: 10.1038/s41562-020-0884-z

- 411 25. Singh AK, Gillies CL, Singh R, Singh A, Chudasama Y, Coles B, Seidu S, Zaccardi F, Davies MJ,  
412 and Khunti K. Prevalence of co-morbidities and their association with mortality in patients with  
413 COVID-19: a systematic review and meta-analysis. *Diabetes, Obes. Metab.* 2020; 22 (10) :1915–24.  
414 DOI: 10.1111/dom.14124
- 415 26. Meyers LA, Pourbohloul B, Newman ME, Skowronski DM, and Brunham RC. Network theory and  
416 SARS: predicting outbreak diversity. *J. Theor. Biol.* 2005; 232 (1) :71–81. DOI: 10.1016/j.jtbi.  
417 2004.07.026
- 418 27. Prem K, Cook AR, and Jit M. Projecting social contact matrices in 152 countries using contact surveys  
419 and demographic data. *PLOS Comput. Biol.* 2017; 13 (9) :e1005697. DOI: 10.1371/journal.pcbi.  
420 1005697
- 421 28. Halloran ME, Ferguson NM, Eubank S, Longini Jr IM, Cummings DA, Lewis B, Xu S, Fraser C,  
422 Vullikanti A, Germann TC, et al. Modeling targeted layered containment of an influenza pandemic in  
423 the United States. *Proc. National Acad. Sci.* 2008; 105 (12) :4639–44. DOI: 10.1073/pnas.0706849105
- 424 29. U.S. Census Bureau. S2501: Occupancy Characteristics. American Community Survey 1-Year Esti-  
425 mates. 2019. Available from: [https://data.census.gov/cedsci/table?q=texas%20household%  
426 20size%20distribution&g=0100000US\\_0400000US12&tid=ACSST1Y2019.S2501](https://data.census.gov/cedsci/table?q=texas%20household%20size%20distribution&g=0100000US_0400000US12&tid=ACSST1Y2019.S2501)
- 427 30. U.S. Census Bureau. DP05: ACS Demographic and Housing Estimates. American Community Survey  
428 1-Year Estimates. 2019. Available from: [https://data.census.gov/cedsci/table?q=age%  
429 20distribution&g=0100000US%240400000&tid=ACSDP1Y2019.DP05](https://data.census.gov/cedsci/table?q=age%20distribution&g=0100000US%240400000&tid=ACSDP1Y2019.DP05)
- 430 31. CDC COVID-19 Response Team, Bialek S, Boundy E, Bowen V, Chow N, Cohn A, Dowling N,  
431 Ellington S, Gierke R, Hall A, et al. Severe outcomes among patients with coronavirus disease 2019  
432 (COVID-19)—United States, February 12–March 16, 2020. *Morb. Mortal. Wkly. Rep.* 2020; 69 (12)  
433 :343. DOI: 10.15585/mmwr.mm6912e2
- 434 32. Bailey NTJ. The mathematical theory of epidemics. eng. New York: Hafner Publishing Company,  
435 1957
- 436 33. Bar-On YM, Flamholz A, Phillips R, and Milo R. Science Forum: SARS-CoV-2 (COVID-19) by the  
437 numbers. *eLife* 2020; 9 :e57309

- 438 34. Linton NM, Kobayashi T, Yang Y, Hayashi K, Akhmetzhanov AR, Jung Sm, Yuan B, Kinoshita R,  
439 and Nishiura H. Incubation period and other epidemiological characteristics of 2019 novel coronavirus  
440 infections with right truncation: a statistical analysis of publicly available case data. *J. Clin. Med.*  
441 2020; 9 (2) :538. DOI: 10.3390/jcm9020538
- 442 35. Rosenberg ES, Dufort EM, Blog DS, Hall EW, Hoefler D, Backenson BP, Muse AT, Kirkwood JN,  
443 St. George K, Holtgrave DR, et al. COVID-19 testing, epidemic features, hospital outcomes, and  
444 household prevalence, New York State—March 2020. *Clin. Infect. Dis.* 2020; 71 (8) :1953–9. DOI:  
445 10.1093/cid/ciaa549
- 446 36. Bar-On YM, Sender R, Flamholz AI, Phillips R, and Milo R. A quantitative compendium of COVID-19  
447 epidemiology. *arXiv preprint arXiv:2006.01283* 2020. DOI: 10.48550/arXiv.2006.01283
- 448 37. Wang Y, Kang H, Liu X, and Tong Z. Asymptomatic cases with SARS-CoV-2 infection. *J. Med. Virol.*  
449 2020; 92 (9) :1401–3. DOI: 10.1002/jmv.25990
- 450 38. The World Bank. Life expectancy. 2022. Available from: [https://data.worldbank.org/indicator/  
451 SP.DYN.LE00.IN?locations=XD](https://data.worldbank.org/indicator/SP.DYN.LE00.IN?locations=XD)
- 452 39. Ugarte MP, Achilleos S, Quattrocchi A, Gabel J, Kolokotroni O, Constantinou C, Nicolaou N,  
453 Rodriguez-Llanes JM, Huang Q, Verstiuk O, et al. Premature mortality attributable to COVID-19:  
454 potential years of life lost in 17 countries around the world, January–August 2020. *BMC Public Health*  
455 2022; 22 (1) :1–13. DOI: 10.1186/s12889-021-12377-1
- 456 40. Wu J, Dhingra R, Gambhir M, and Remais JV. Sensitivity analysis of infectious disease models:  
457 methods, advances and their application. *J. The Royal Soc. Interface* 2013; 10 (86) :20121018. DOI:  
458 10.1098/rsif.2012.1018
- 459 41. R Core Team. R: A Language and Environment for Statistical Computing. R Foundation for Statistical  
460 Computing. Vienna, Austria, 2022. Available from: <https://www.R-project.org/>
- 461 42. National Center for Health Statistics. Conditions Contributing to COVID-19 Deaths, by State and  
462 Age, Provisional 2020–2022. 2022. Available from: [https://data.cdc.gov/NCHS/Conditions-  
463 Contributing-to-COVID-19-Deaths-by-Stat/hk9y-quqm](https://data.cdc.gov/NCHS/Conditions-Contributing-to-COVID-19-Deaths-by-Stat/hk9y-quqm)
- 464 43. Mayer G. The family and medical leave act (FMLA): Policy issues. Library of Congress Washington  
465 DC Congressional Research Service. 2013

- 466 44. Wu JT, Riley S, Fraser C, and Leung GM. Reducing the impact of the next influenza pandemic using  
467 household-based public health interventions. *PLOS Med.* 2006; 3 (9) :e361. DOI: 10.1371/journal.  
468 pmed.0030361
- 469 45. House T and Keeling M. Household structure and infectious disease transmission. *Epidemiol. & Infect.*  
470 2009; 137 (5) :654–61. DOI: 10.1017/S0950268808001416
- 471 46. Bonaccorsi G, Pierri F, Cinelli M, Flori A, Galeazzi A, Porcelli F, Schmidt AL, Valensise CM, Scala  
472 A, Quattrocioni W, et al. Economic and social consequences of human mobility restrictions under  
473 COVID-19. *Proc. National Acad. Sci.* 2020; 117 (27) :15530–5. DOI: 10.1073/pnas.2007658117
- 474 47. Engzell P, Frey A, and Verhagen MD. Learning loss due to school closures during the COVID-19  
475 pandemic. *Proc. National Acad. Sci.* 2021; 118 (17) :e2022376118. DOI: 10.1073/pnas.2022376118
- 476 48. Iio K, Guo X, Kong X, Rees K, and Wang XB. COVID-19 and social distancing: Disparities in  
477 mobility adaptation between income groups. *Transp. Res. Interdiscip. Perspect.* 2021; 10 :100333.  
478 DOI: 10.1016/j.trip.2021.100333
- 479 49. Tan SB, DeSouza P, and Raifman M. Structural racism and COVID-19 in the USA: a county-level  
480 empirical analysis. *J. Racial Ethn. Health Disparities* 2022; 9 (1) :236–46. DOI: 10.1007/s40615-  
481 020-00948-8
- 482 50. Kabarriti R, Brodin NP, Maron MI, Guha C, Kalnicki S, Garg MK, and Racine AD. Association  
483 of race and ethnicity with comorbidities and survival among patients with COVID-19 at an urban  
484 medical center in New York. *JAMA network open* 2020; 3 (9) :e2019795–e2019795. DOI: 10.1001/  
485 jamanetworkopen.2020.19795
- 486 51. Seligman B, Ferranna M, and Bloom DE. Social determinants of mortality from COVID-19: A simu-  
487 lation study using NHANES. *PLoS medicine* 2021; 18 (1) :e1003490. DOI: 10.1371/journal.pmed.  
488 1003490
- 489 52. Li W, Zhang B, Lu J, Liu S, Chang Z, Peng C, Liu X, Zhang P, Ling Y, Tao K, et al. Characteristics  
490 of household transmission of COVID-19. *Clin. Infect. Dis.* 2020; 71 (8) :1943–6. DOI: 10.1093/cid/  
491 ciaa450
- 492 53. Lei H, Xu X, Xiao S, Wu X, and Shu Y. Household transmission of COVID-19—a systematic review  
493 and meta-analysis. *J. Infect.* 2020; 81 (6) :979–97. DOI: 10.1016/j.jinf.2020.08.033

- 494 54. Madewell ZJ, Yang Y, Longini IM, Halloran ME, and Dean NE. Factors associated with household  
495 transmission of SARS-CoV-2: an updated systematic review and meta-analysis. *JAMA Netw. Open*  
496 2021; 4 (8) :e2122240–e2122240. DOI: 10.1001/jamanetworkopen.2021.22240
- 497 55. Dawood FS, Porucznik CA, Veguilla V, Stanford JB, Duque J, Rolfes MA, Dixon A, Thind P, Hacker  
498 E, Castro MJE, et al. Incidence rates, household infection risk, and clinical characteristics of SARS-  
499 CoV-2 infection among children and adults in Utah and New York City, New York. *JAMA Pediatr.*  
500 2022; 176 (1) :59–67. DOI: 10.1001/jamapediatrics.2021.4217
- 501 56. Bilinski A, Salomon JA, Giardina J, Ciaranello A, and Fitzpatrick MC. Passing the test: a model-  
502 based analysis of safe school-reopening strategies. *Ann. internal medicine* 2021; 174 (8) :1090–100.  
503 DOI: 10.7326/M21-0600
- 504 57. Rossman H, Meir T, Somer J, Shilo S, Gutman R, Ben Arie A, Segal E, Shalit U, and Gorfine M.  
505 Hospital load and increased COVID-19 related mortality in Israel. *Nat. Commun.* 2021; 12 (1) :1–7.  
506 DOI: 10.1038/s41467-021-22214-z
- 507 58. Estiri H, Strasser ZH, and Murphy SN. Individualized prediction of COVID-19 adverse outcomes with  
508 MLHO. *Sci. Reports* 2021; 11 (1) :1–9. DOI: 10.1038/s41598-021-84781-x
- 509 59. Moreira A, Chorath K, Rajasekaran K, Burmeister F, Ahmed M, and Moreira A. Demographic pre-  
510 dictors of hospitalization and mortality in US children with COVID-19. *Eur. J. Pediatr.* 2021; 180  
511 (5) :1659–63. DOI: 10.1007/s00431-021-03955-x
- 512 60. Bubar KM, Reinholt K, Kissler SM, Lipsitch M, Cobey S, Grad YH, and Larremore DB. Model-  
513 informed COVID-19 vaccine prioritization strategies by age and serostatus. *Science* 2021; 371 (6532)  
514 :916–21. DOI: 10.1126/science.abe6959



# Supplementary Information:

## The illusion of personal health decisions for infectious disease management: disease spread in social contact networks

Matthew Michalska-Smith, Eva A Enns, Lauren A White, Marie L J Gilbertson & Meggan E Craft

### Contents

|                                                                            |           |
|----------------------------------------------------------------------------|-----------|
| <b>S1 Network data sources</b>                                             | <b>23</b> |
| <b>S2 Locality network structure comparison</b>                            | <b>24</b> |
| <b>S3 Alternative background transmission</b>                              | <b>25</b> |
| S3.1 No background transmission ( $\beta_{background} = 0$ ) . . . . .     | 25        |
| S3.2 High background transmission ( $\beta_{background} = 0.1$ ) . . . . . | 28        |
| <b>S4 Simulation code accessibility details</b>                            | <b>30</b> |
| <b>S5 Link removal irrespective of (proximate) vulnerability</b>           | <b>31</b> |

### S1 Network data sources

To construct our plausible human contact networks, we relied on a range of publicly available data sources. For household sizes, we used state-specific data for Florida [S1] and Texas [S2], for the latter, we were only able to obtain accurate numbers for households with three or fewer occupants, so higher values were extrapolated from the overall average occupancy [S3]. Individual vulnerability was assigned based on age-specific COVID-19 induced mortality rates [S4]. To construct the underlying age distribution, we used United States American Community Survey data from 2019, specifically publications DP05: Demographic and Housing Estimates [S5]. Each individual in the network was probabilistically assigned into one of thirteen (less than 5 years old, 5-9, 10-14, 15-19, 20-24, 25-34, 35-44, 45-54, 55-59, 60-64, 65-74, 75-84, or greater than 84 years old) age classes based on state-specific age distributions. The distribution of ages across the network was modified from an initial random allocation to prevent the occurrence of households in which all

539 individuals were children.

540 The school layer was constructed by taking all school-age individuals (5-9, 10-14, or 15-19 years old) and  
541 assigning them into age-class-specific classrooms of approximately 20 students per classroom [S6]. Within  
542 each classroom, networks were fully connected: all students had the same interaction strength with all other  
543 students in the classroom.

544 The workplace layer similarly considered all working-age adults (20-24, 25-34, 35-44, 45-54, 55-59, or  
545 60-64 years old), subtracted a percentage (10%) based on unemployment rates in the spring-summer of 2020  
546 [S7], and assigned the remainder to workplaces whose size was loosely based on the distribution of workplace  
547 sizes in the United States [S8]. This latter distribution was modified to remove especially small (less than 5  
548 workers) and large (greater than 100 workers) work places. Within workplaces, as with classrooms, networks  
549 are fully connected: all workers have an equal level of contact with all other workers at the same workplace.

## 550 S2 Locality network structure comparison

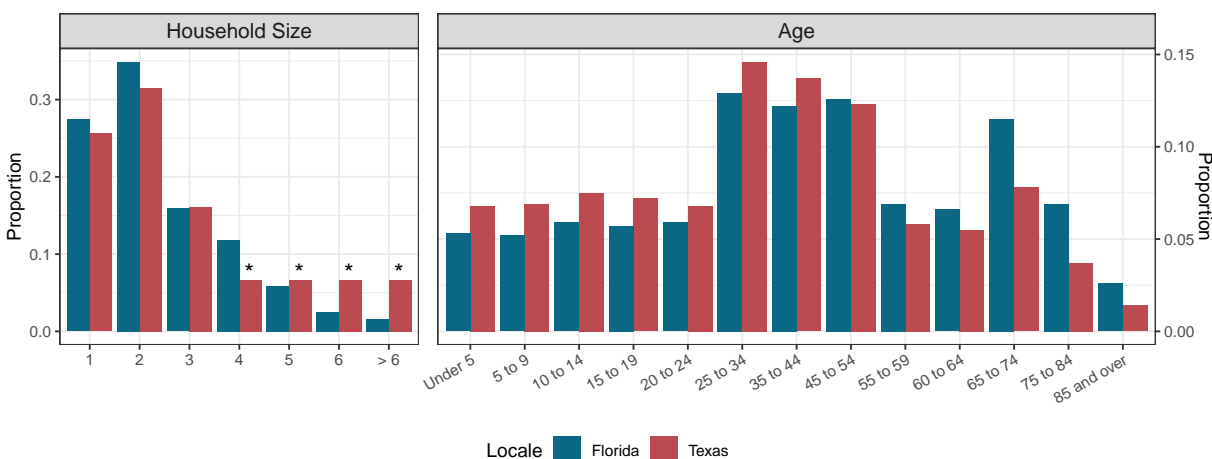

Figure S1: Household size (left) and age (right) distributions for each of the two locales used in the main text. *n.b.* left and right plots have different vertical axis limits. While Florida tends to have older citizens, Texas tends to have larger families (and consequently more within-household interactions; see also table 1). Asterisks denote values for Texas household size that were inferred to match an overall mean household size in the absence of precise data.

## 551 S3 Alternative background transmission

### 552 S3.1 No background transmission ( $\beta_{background} = 0$ )

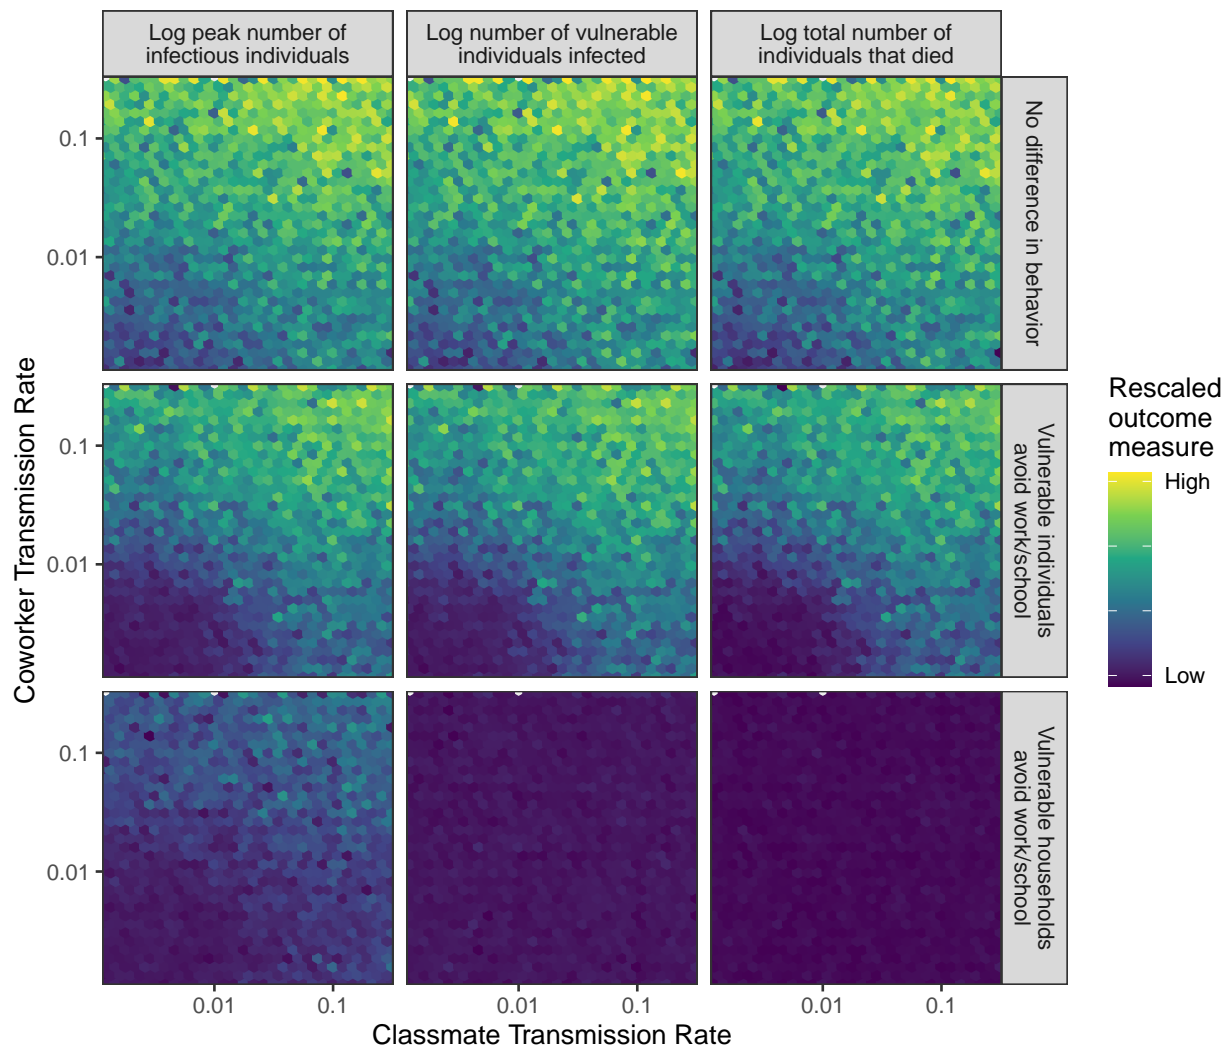

Figure S2: As fig. 1 in the main text, but with no background transmission. Relative epidemic outcome, quantified as the peak number of individuals infected (left), the number of vulnerable individuals infected (middle), or the total number of individuals that died (right) over the course of the simulation. Individuals in the network either: did not change behaviour in response to (contact with individuals with) vulnerability status (top), changed behaviour if they were vulnerable themselves (middle), or changed behaviour when a member of their household was vulnerable (bottom). Multiple points within each hexagon were averaged to produce the plotted value. Mean values were then log-scaled and normalized for each epidemic outcome such that the maximum value is 1 (yellow) and the minimum value is 0 (purple). Each panel consists of a heatmap showing the relative epidemic outcome of simulations spanning various levels of co-worker (vertical axis) and classmate (horizontal axis) transmission.

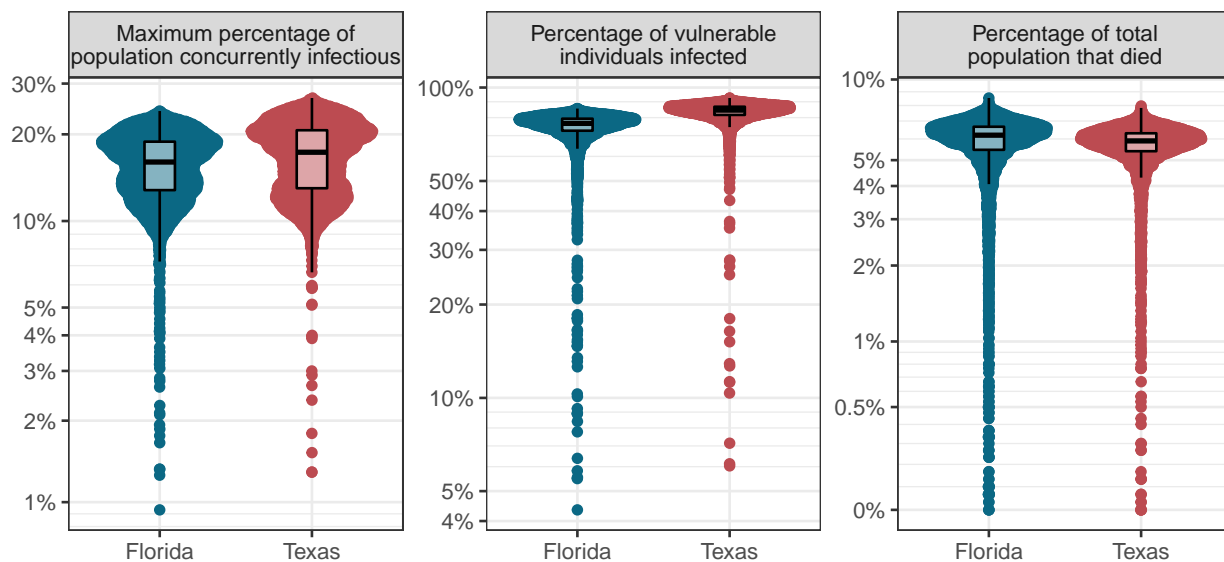

Figure S3: As fig. 2 in the main text, but with no background transmission. Comparing the difference in peak proportion infectious, overall prevalence among vulnerable individuals, and overall mortality between simulations of epidemics in two possible population structures, as characterized by age- and household-size distributions. Only simulations with no difference in behaviour based on vulnerability and only outcomes from epidemics resulting in greater than 5% of the total population being infected are shown.

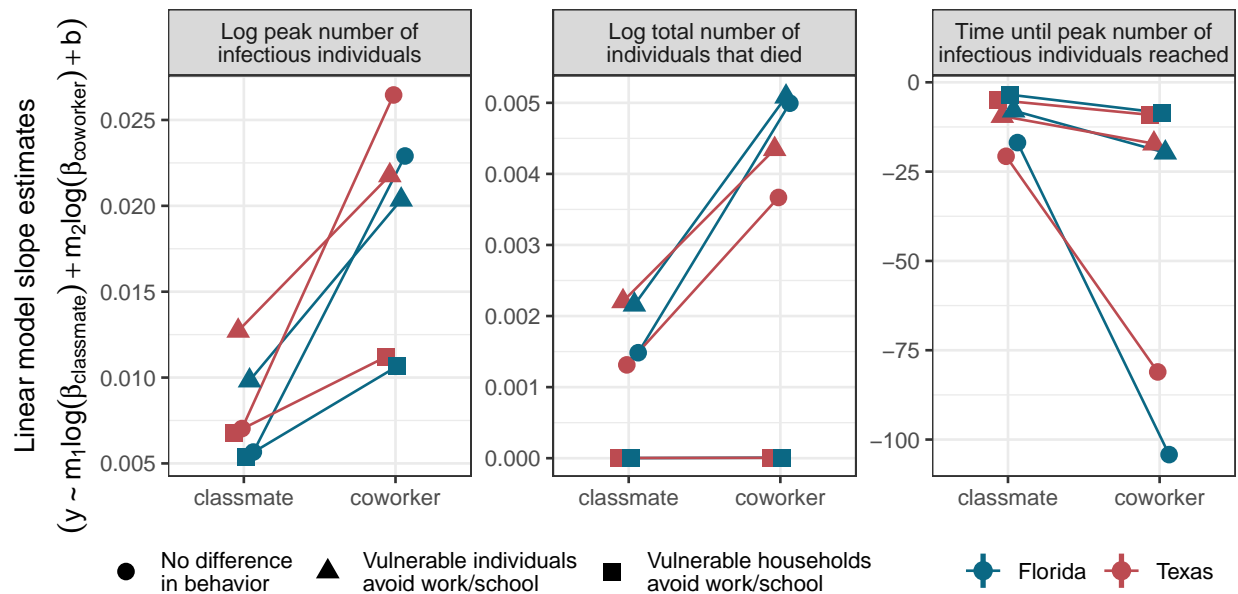

Figure S4: As fig. 3 in the main text, but with no background transmission. The vertical axis indicates the value of the best-fitting coefficient for each transmission rate in a linear model fit to simulation output. Facets distinguish between epidemic outcome measures, point shapes distinguish risk-tolerance regimes (*i.e.* rows in fig. 1), and point colours distinguish age and household size distribution locales (as in fig. 2). Vertical lines extending beyond the point extents indicate 95% confidence intervals for the slope estimates (some confidence intervals are obscured by the points). To ease interpretation, lines connect coefficient values across interaction types for results from models of the same risk-tolerance regime and locale. Points are slightly offset horizontally to reduce overlap. Only outcomes from epidemics resulting in greater than 5% of the total population being infected were included in the linear models.

553 **S3.2 High background transmission ( $\beta_{background} = 0.1$ )**

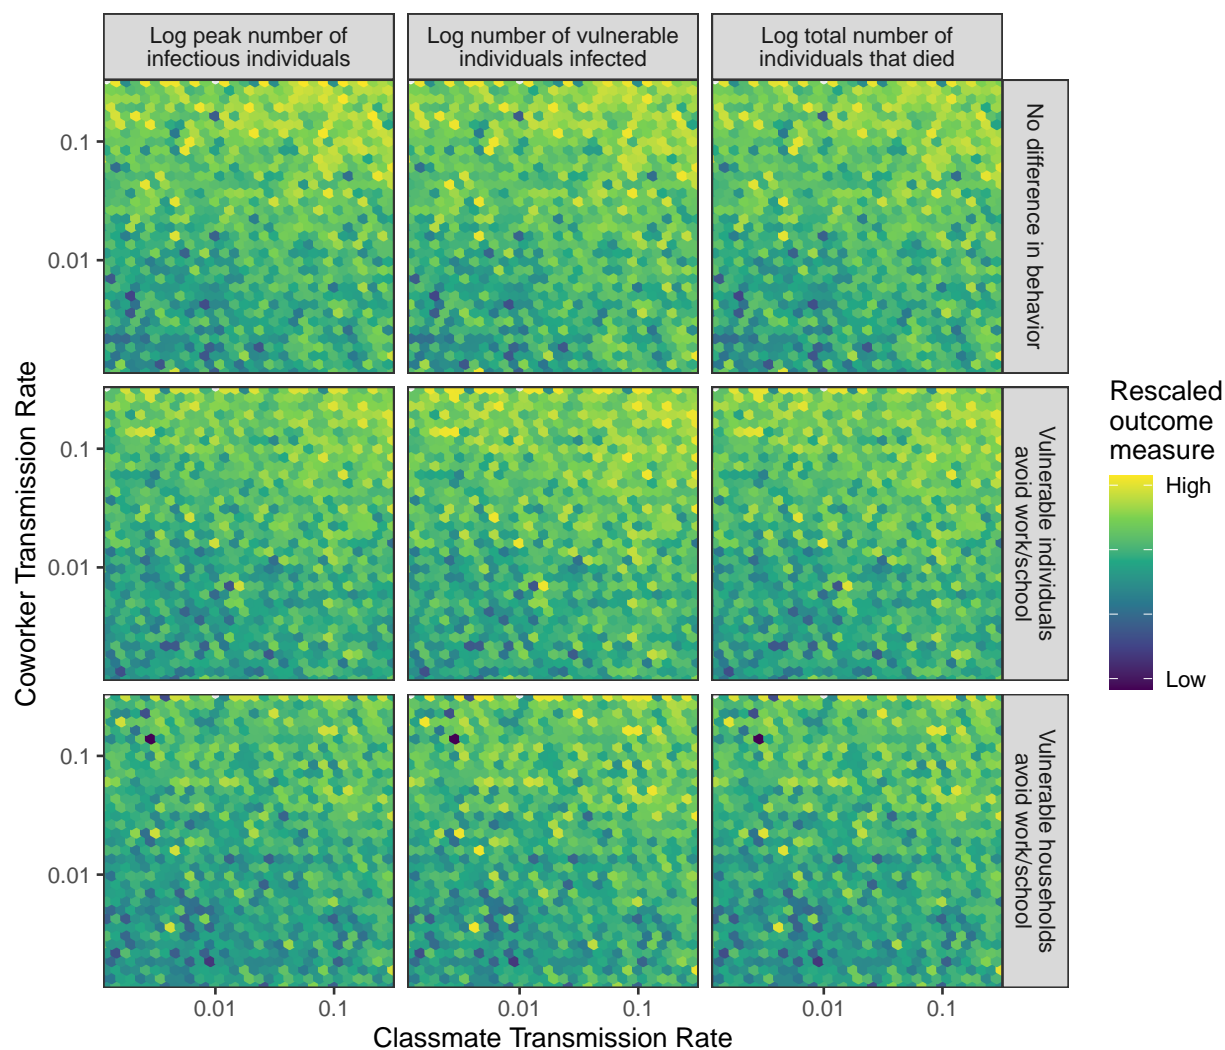

Figure S5: As figs. 1 and S2, but with background transmission set to  $\beta_{background} = 0.1/N$ .

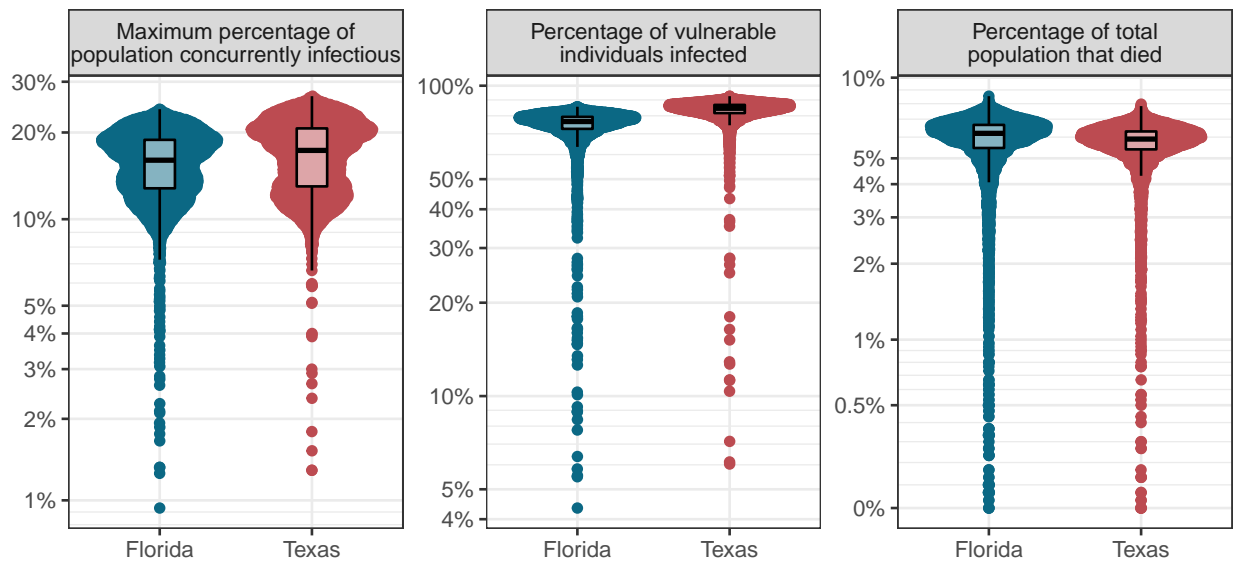

Figure S6: As figs. 2 and S3, but with background transmission set to  $\beta_{background} = 0.1/N$ .

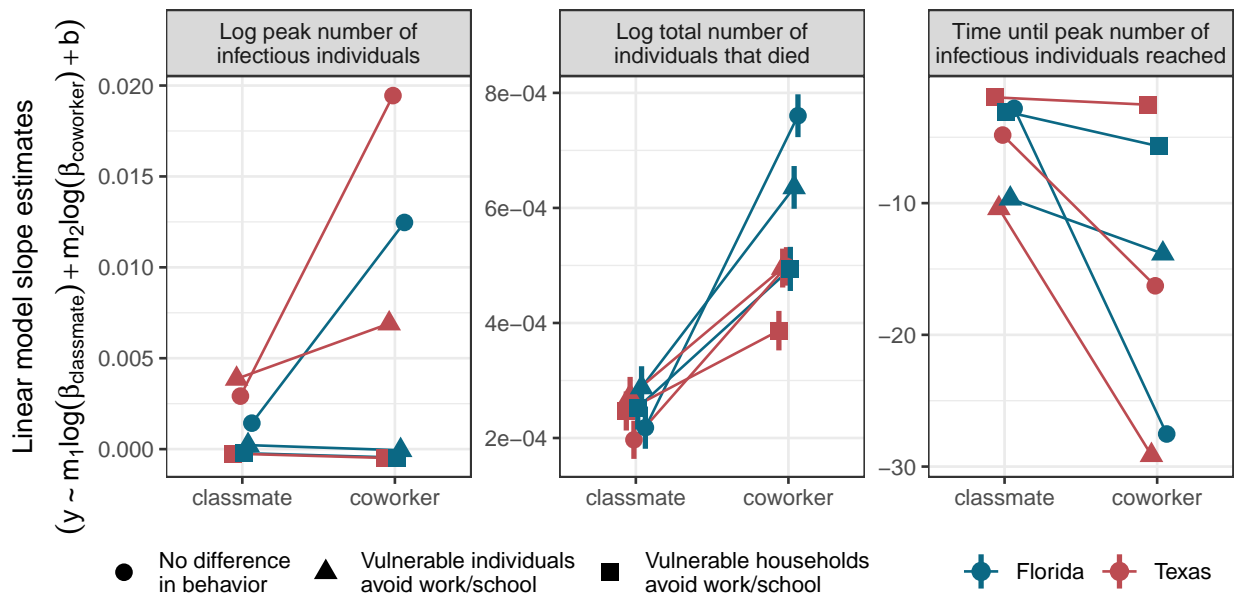

Figure S7: As figs. 3 and S4, but with background transmission set to  $\beta_{background} = 0.1/N$ .

## 554 **S4 Simulation code accessibility details**

555 All simulations were conducted in C++ version 8.1.0, with data manipulation and plotting done in R version  
556 4.2.0 [S9], with the use of R packages: assertthat [S10], ggbeeswarm [S11], kableExtra [S12], patchwork [S13],  
557 Rcpp [S14, S15, S16], tidygraph [S17], tidyverse [S18], and scales [S19].

558 An application for visualizing our synthetic community network structure and simulating disease spread  
559 (including the manipulation of disease parameters) is available online: <https://z.umn.edu/LINCS> [S20].  
560 Code to replicate all aspects of these analyses is available online: [https://github.com/mjsmith037/  
561 Layered\\_Interactions\\_COVID\\_Model](https://github.com/mjsmith037/Layered_Interactions_COVID_Model).



## 562 S5 Link removal irrespective of (proximate) vulnerability

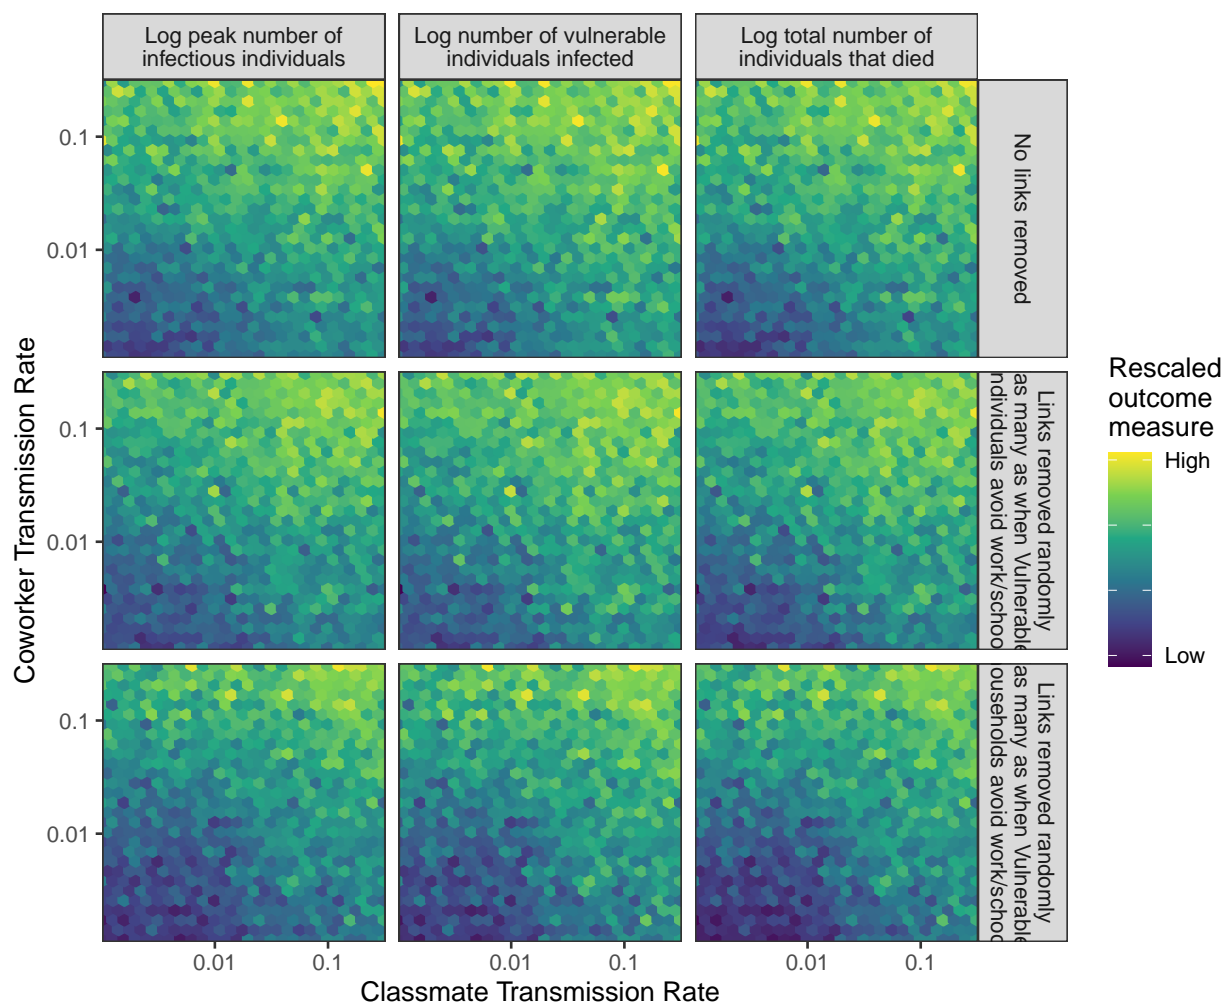

Figure S8: As fig. 1 in the main text, but rather than removing links in association with an individual's contact with vulnerable individuals, the same number of links were removed randomly from the same interaction types as in fig. 1.

## References

- 563
- 564 S1. Miami Matters. 2022 Demographics. 2022. Available from: [https://www.miamidadematters.org/demographicdata?id=12&sectionId=936#sectionPiece\\_65](https://www.miamidadematters.org/demographicdata?id=12&sectionId=936#sectionPiece_65)
- 565
- 566 S2. U.S. Census Bureau. S2501: Occupancy Characteristics. American Community Survey 1-Year Estimates. 2019. Available from: [https://data.census.gov/cedsci/table?q=texas%20household%20size%20distribution&g=0100000US\\_0400000US12&tid=ACSST1Y2019.S2501](https://data.census.gov/cedsci/table?q=texas%20household%20size%20distribution&g=0100000US_0400000US12&tid=ACSST1Y2019.S2501)
- 567
- 568
- 569 S3. Texas Demographic Center. Texas Household Trends and Projections, 2010-2050. 2021. Available from:
- 570 [https://demographics.texas.gov/Resources/publications/2021/20210415\\_HouseholdsTrendsProj\\_](https://demographics.texas.gov/Resources/publications/2021/20210415_HouseholdsTrendsProj_Brief.pdf)
- 571 [Brief.pdf](https://demographics.texas.gov/Resources/publications/2021/20210415_HouseholdsTrendsProj_Brief.pdf)
- 572 S4. Centers for Disease Control & Prevention. Morbidity and Mortality Weekly Report, 18 March 2020.
- 573 2020. Available from: [http://www.ecie.com.ar/images/paginas/COVID-19/4MMWR-Severe\\_](http://www.ecie.com.ar/images/paginas/COVID-19/4MMWR-Severe_Outcomes_Among_Patients_with_Coronavirus_Disease_2019_COVID-19-United_States_February_12-March_16_2020.pdf)
- 574 [Outcomes\\_Among\\_Patients\\_with\\_Coronavirus\\_Disease\\_2019\\_COVID-19-United\\_States\\_](http://www.ecie.com.ar/images/paginas/COVID-19/4MMWR-Severe_Outcomes_Among_Patients_with_Coronavirus_Disease_2019_COVID-19-United_States_February_12-March_16_2020.pdf)
- 575 [February\\_12-March\\_16\\_2020.pdf](http://www.ecie.com.ar/images/paginas/COVID-19/4MMWR-Severe_Outcomes_Among_Patients_with_Coronavirus_Disease_2019_COVID-19-United_States_February_12-March_16_2020.pdf)
- 576 S5. U.S. Census Bureau. DP05: ACS Demographic and Housing Estimates. American Community Survey
- 577 1-Year Estimates. 2019. Available from: [https://data.census.gov/cedsci/table?q=age%](https://data.census.gov/cedsci/table?q=age%20distribution&g=0100000US%240400000&tid=ACSDP1Y2019.DP05)
- 578 [20distribution&g=0100000US%240400000&tid=ACSDP1Y2019.DP05](https://data.census.gov/cedsci/table?q=age%20distribution&g=0100000US%240400000&tid=ACSDP1Y2019.DP05)
- 579 S6. U.S. National Center for Education Statistics. Average class size in public schools, by class type and
- 580 state: 2017–18. 2018. Available from: [https://nces.ed.gov/surveys/ntps/tables/ntps1718\\_](https://nces.ed.gov/surveys/ntps/tables/ntps1718_fltable06_t1s.asp)
- 581 [fltable06\\_t1s.asp](https://nces.ed.gov/surveys/ntps/tables/ntps1718_fltable06_t1s.asp)
- 582 S7. U.S. Bureau of Labor Statistics. Seasonally Adjusted Unemployment Rate. 2020. Available from:
- 583 <https://www.bls.gov/data/#unemployment>
- 584 S8. North American Industry Classification System Association. U.S. Business Firmographics—Company
- 585 Size. 2020. Available from: <https://www.naics.com/business-lists/counts-by-company-size/>
- 586 S9. R Core Team. R: A Language and Environment for Statistical Computing. R Foundation for Statistical
- 587 Computing. Vienna, Austria, 2022. Available from: <https://www.R-project.org/>
- 588 S10. Wickham H. assertthat: Easy Pre and Post Assertions. R package version 0.2.1. 2019. Available from:
- 589 <https://CRAN.R-project.org/package=assertthat>
- 590 S11. Clarke E and Sherrill-Mix S. ggbeeswarm: Categorical Scatter (Violin Point) Plots. R package version
- 591 0.6.0. 2017. Available from: <https://CRAN.R-project.org/package=ggbeeswarm>

- 592 S12. Zhu H. kableExtra: Construct Complex Table with 'kable' and Pipe Syntax. R package version 1.3.4.  
593 2021. Available from: <https://CRAN.R-project.org/package=kableExtra>
- 594 S13. Pedersen TL. patchwork: The Composer of Plots. R package version 1.1.1. 2020. Available from:  
595 <https://CRAN.R-project.org/package=patchwork>
- 596 S14. Eddelbuettel D and François R. Rcpp: Seamless R and C++ Integration. *J. Stat. Softw.* 2011; 40 (8)  
597 :1–18. DOI: 10.18637/jss.v040.i08
- 598 S15. Eddelbuettel D. Seamless R and C++ Integration with Rcpp. ISBN 978-1-4614-6867-7. New York:  
599 Springer, 2013. DOI: 10.1007/978-1-4614-6868-4
- 600 S16. Eddelbuettel D and Balamuta JJ. Extending *R* with *C++*: A Brief Introduction to *Rcpp*. *The Am.*  
601 *Stat.* 2018; 72 (1) :28–36. DOI: 10.1080/00031305.2017.1375990
- 602 S17. Pedersen TL. tidygraph: A Tidy API for Graph Manipulation. R package version 1.2.1. 2022. Available  
603 from: <https://CRAN.R-project.org/package=tidygraph>
- 604 S18. Wickham H, Averick M, Bryan J, Chang W, McGowan LD, François R, Golemund G, Hayes A, Henry  
605 L, Hester J, Kuhn M, Pedersen TL, Miller E, Bache SM, Müller K, Ooms J, Robinson D, Seidel DP,  
606 Spinu V, Takahashi K, Vaughan D, Wilke C, Woo K, and Yutani H. Welcome to the tidyverse. *J.*  
607 *Open Source Softw.* 2019; 4 (43) :1686. DOI: 10.21105/joss.01686
- 608 S19. Wickham H and Seidel D. scales: Scale Functions for Visualization. R package version 1.2.0. 2022.  
609 Available from: <https://CRAN.R-project.org/package=scales>
- 610 S20. Michalska-Smith M, White L, Gilbertson M, and Craft M. Layered Interaction Network COVID-19  
611 Simulator. 2021. Available from: <https://z.umn.edu/LINCS>
